# Supplementary material for: Intercalation of two-dimensional oxalate-bridged molecule-based magnets into layered double hydroxide hosts
Source: Royal Society of Chemistry journal article supplement (doi:10.1039/c0jm01722a), 2010-01-01

# Supplementary Information

## Intercalation of Two-Dimensional Oxalate-Bridged Molecule-Based Magnets into Layered Double Hydroxide Hosts

Eugenio Coronado,<sup>\*a</sup> Carlos Martí-Gastaldo,<sup>a</sup> Efrén Navarro-Moratalla,<sup>a</sup> Antonio Ribera,<sup>a,b</sup> and José R. Galán-Mascarós<sup>c</sup>

Table of contents:

|                                                                                                                                                                                                                                                                                                                                           |    |
|-------------------------------------------------------------------------------------------------------------------------------------------------------------------------------------------------------------------------------------------------------------------------------------------------------------------------------------------|----|
| <b>SI 1.</b> SEM images showing the particle's size and morphology of the ZnAl-CO <sub>3</sub> LDH (1, a) and the nitrate-intercalated LDH (2, b).....                                                                                                                                                                                    | 2  |
| <b>SI 2.</b> Metal-to-metal ratio of the pristine ZnAl-CO <sub>3</sub> LDH (1), the nitrate-intercalated LDH (2) and the hybrid material (3), as estimated from EDAX analysis. ....                                                                                                                                                       | 3  |
| <b>SI 3.</b> <i>Top:</i> FT-IR spectra of 2 (black) and 3 (blue). <i>Bottom:</i> zoom-in of the 2000-500 cm <sup>-1</sup> region. ....                                                                                                                                                                                                    | 4  |
| <b>SI 4.</b> Assignment of the main vibration modes for 2-3. ....                                                                                                                                                                                                                                                                         | 5  |
| <b>SI 5.</b> TG/DTA curves of 2 ( <i>top</i> ) and 3 ( <i>bottom</i> ).....                                                                                                                                                                                                                                                               | 6  |
| <b>SI 6.</b> Water content as derived from the thermogravimetric analysis and estimated molecular formula of the LDH-NO <sub>3</sub> precursor (2) and the restacked material (3).....                                                                                                                                                    | 7  |
| <b>SI 7.</b> Best fitting (red line) of the experimental data to a Curie-Weiss law in the 150-300 K interval. ....                                                                                                                                                                                                                        | 8  |
| <b>SI 8.</b> Field dependence of the magnetization of 3 at 2K. ....                                                                                                                                                                                                                                                                       | 9  |
| <b>SI 9.</b> <i>Top:</i> Hysteresis loop of 3 measured at 2 K. <i>Bottom:</i> zoom-in showing the low field area. Solid lines are only a guide to the eye. ....                                                                                                                                                                           | 10 |
| <b>SI 10.</b> UV-Vis spectra of the emulsions resulting from the exfoliation of ZnAl-LDH at different concentrations: 1 (green), 0.86 (orange), 0.73 (lavanda), 0.63 (pink), 0.55 (blue), 0.47 (grey), 0.41 g.dm <sup>-3</sup> (black). The inset shows the linear relationship between the absorbance at 278 nm and the LDH content..... | 11 |

SI 1. SEM images showing the particle's size and morphology of the ZnAl-CO<sub>3</sub> LDH (1, a) and the nitrate-intercalated LDH (2, b).

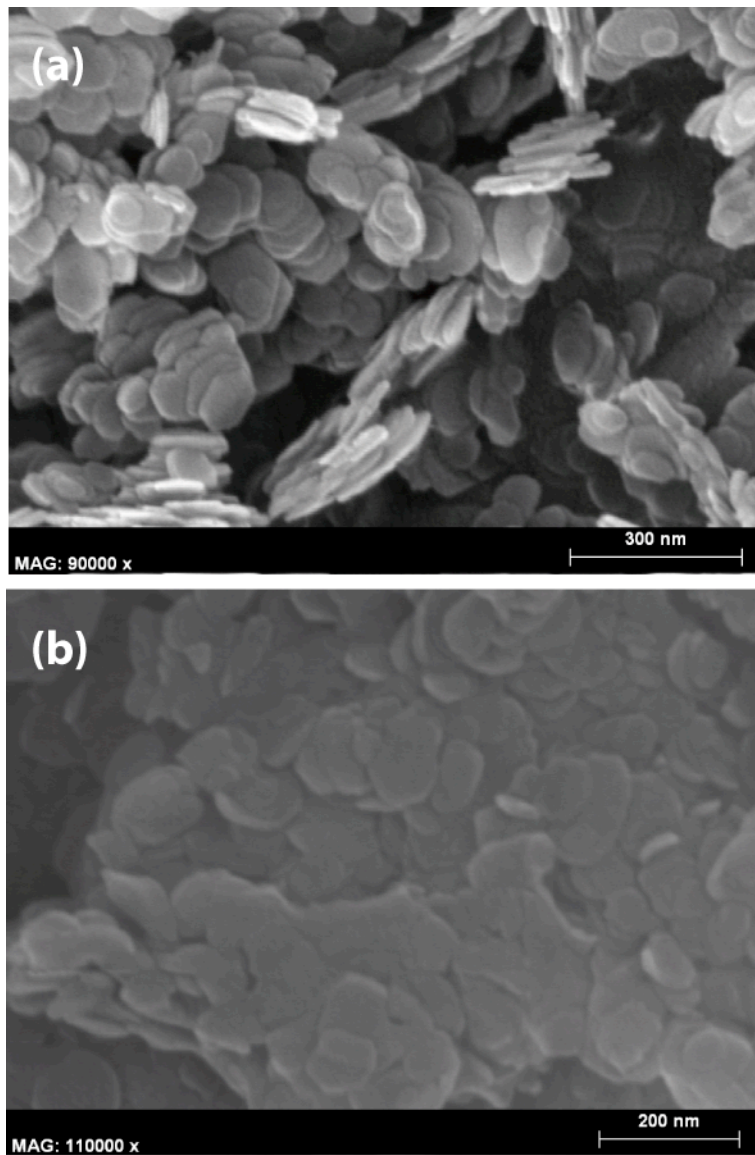

SI 2. Metal-to-metal ratio of the pristine ZnAl-CO<sub>3</sub> LDH (**1**), the nitrate-intercalated LDH (**2**) and the hybrid material (**3**), as estimated from EDAX analysis.

|          | Al/Zn | Al/Cr | Cr/Mn |
|----------|-------|-------|-------|
| <b>1</b> | 0.52  | -     | -     |
| <b>2</b> | 0.54  | -     | -     |
| <b>3</b> | 0.51  | 2.92  | 1.54  |

SI 3. *Top*: FT-IR spectra of **2** (black) and **3** (blue). *Bottom*: zoom-in of the 2000-500  $\text{cm}^{-1}$  region.

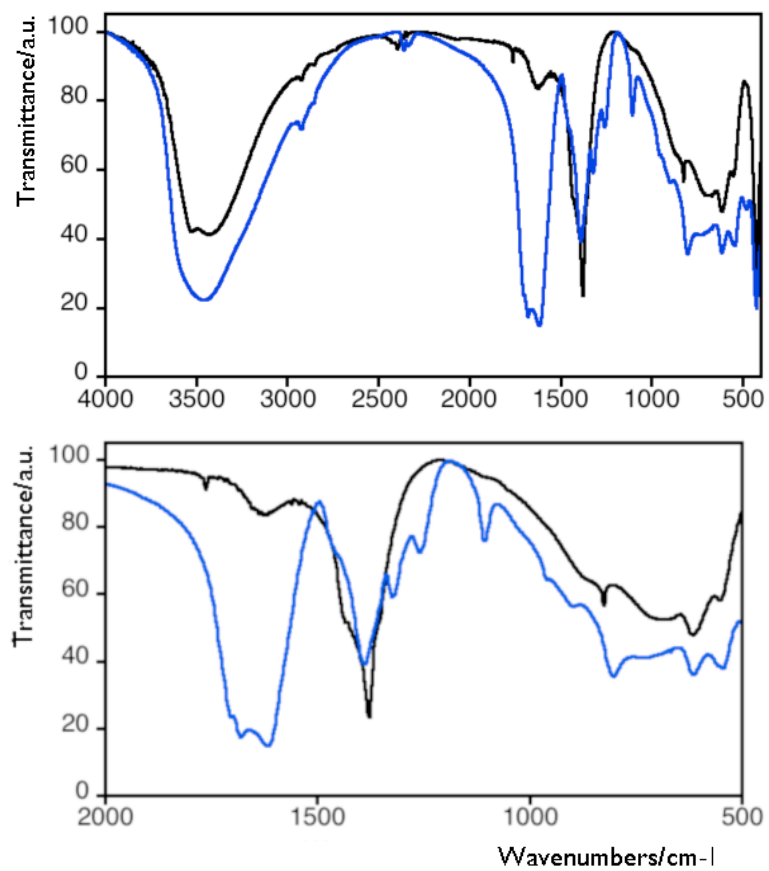

SI 4. Assignment of the main vibration modes for **2-3**.

| Vibration modes [cm <sup>-1</sup> ] |    | <b>2</b>   | <b>3</b>      |
|-------------------------------------|----|------------|---------------|
| ν[O-H]                              |    | 3530, 3430 | 3457          |
| ν[C-O]                              | as | -          | 1681, 1616    |
|                                     | s  | -          | 1324, 1261    |
| ν[N-O]                              |    | 1379, 1750 | 1390          |
| ν[M-O]                              |    | 618        | 669           |
| δ[O-M-O]                            |    | 551, 426   | 545, 482, 427 |

SI 5. TG/DTA curves of **2** (top) and **3** (bottom).

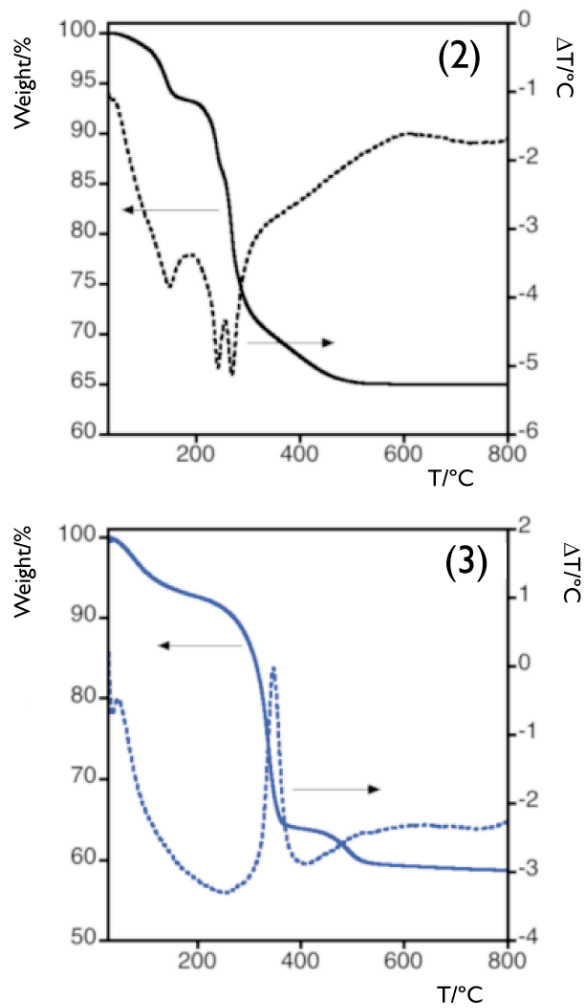

SI 6. Water content as derived from the thermogravimetric analysis and estimated molecular formula of the LDH-NO<sub>3</sub> precursor (**2**) and the restacked material (**3**).

| Water content |             | Molecular formula                                                                                                                                                             |
|---------------|-------------|-------------------------------------------------------------------------------------------------------------------------------------------------------------------------------|
| Wt. loss      | %Mol.       |                                                                                                                                                                               |
| <b>2</b>      | 6.32    1.2 | [Zn <sub>1.95</sub> Al <sub>1.05</sub> (OH) <sub>6</sub> ](NO <sub>3</sub> ) <sub>1.05</sub> •1.2H <sub>2</sub> O                                                             |
| <b>3</b>      | 8.90    2.5 | [Zn <sub>2.12</sub> Al <sub>1.08</sub> (OH) <sub>6</sub> ][Mn <sub>0.24</sub> {Cr(ox) <sub>3</sub> } <sub>0.37</sub> ](NO <sub>3</sub> ) <sub>0.85</sub> •2.5H <sub>2</sub> O |

SI 7. Best fitting (red line) of the experimental data to a Curie-Weiss law in the 150-300 K interval.

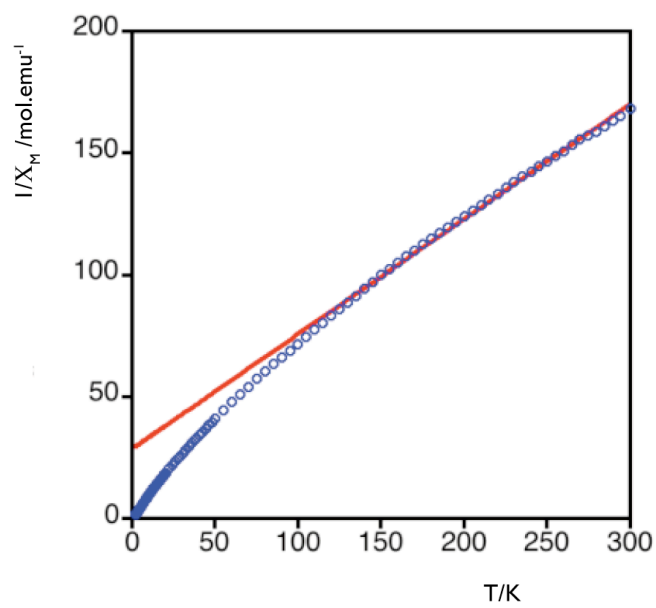



SI 8. Field dependence of the magnetization of **3** at 2K.

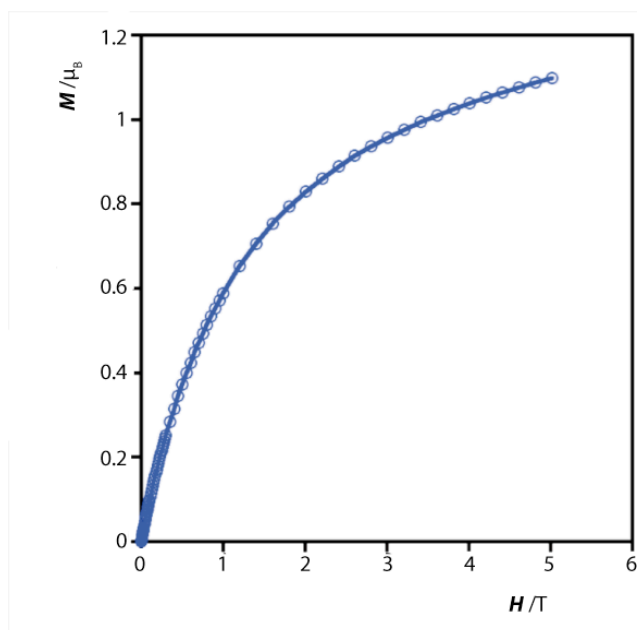

SI 9. Top: Hysteresis loop of **3** measured at 2 K. Bottom: zoom-in showing the low field area. Solid lines are only a guide to the eye.

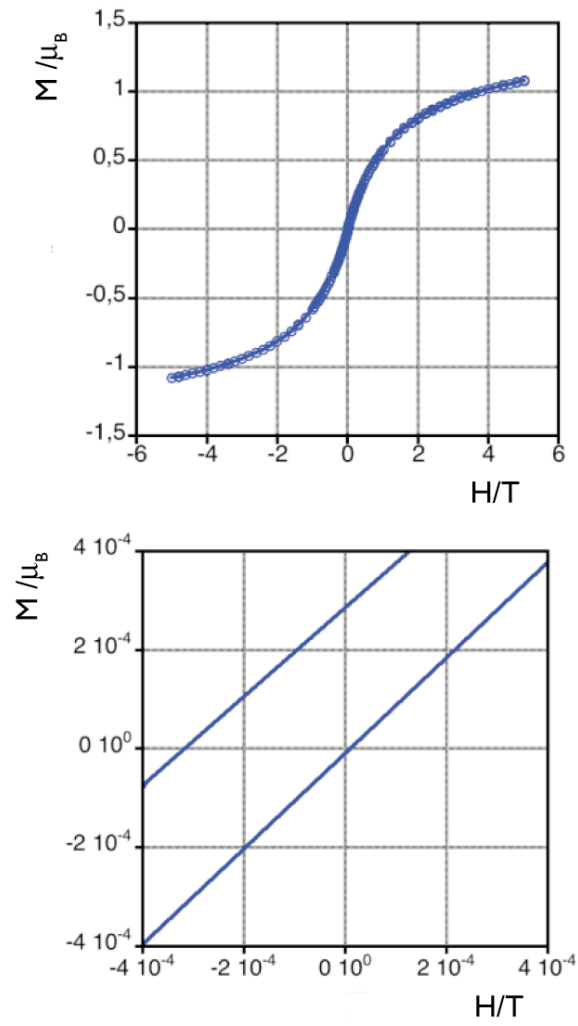

SI 10. UV-Vis spectra of the emulsions resulting from the exfoliation of ZnAl-LDH at different concentrations: 1 (green), 0.86 (orange), 0.73 (lavanda), 0.63 (pink), 0.55 (blue), 0.47 (grey), 0.41 g.dm<sup>-3</sup> (black). The inset shows the linear relationship between the absorbance at 278 nm and the LDH content.

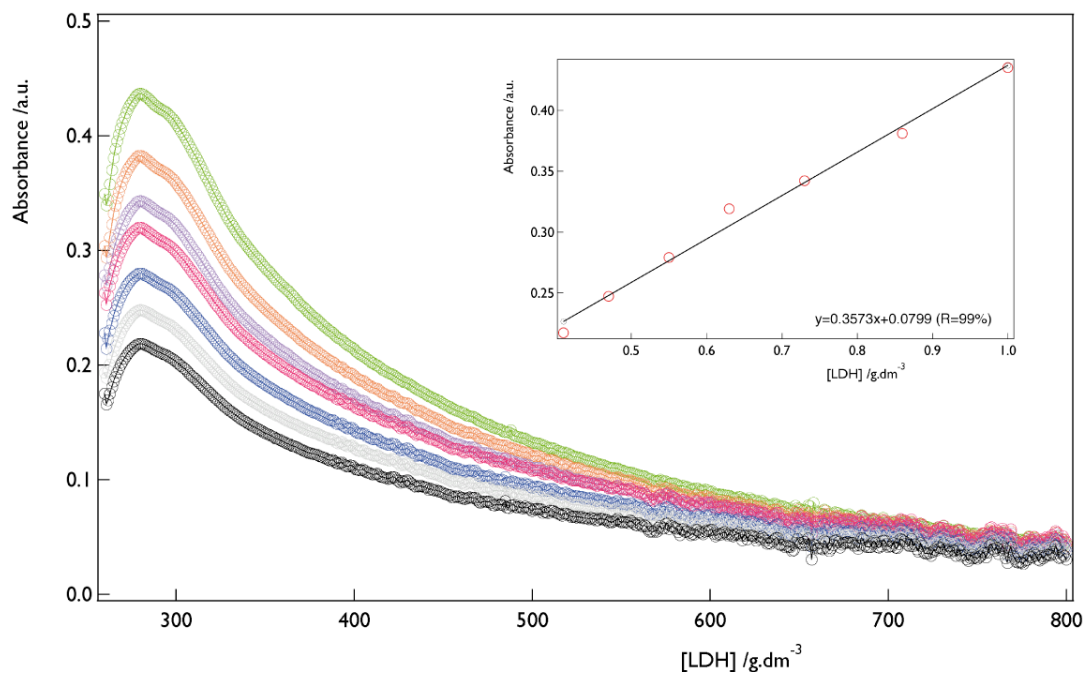

Supplement: c0jm01722a.pdf [file c0jm01722a.pdf]
